# Supplementary material for: Gas-phase esterification within a miniature ion trap mass spectrometer: mechanistic insight and diagnostic markers for quinolone screening
Source: Royal Society of Chemistry journal article supplement (doi:10.1039/d5an01210d), 2025-12-22
Supplement: d5an01210d1.pdf [file d5an01210d1.pdf]

## ***Supporting Information***

### **Gas-Phase Esterification within a Miniature Ion Trap Mass Spectrometer: Mechanistic Insight and Diagnostic Markers for Quinolone Screening**

Wei Wang,<sup>1#</sup> Baokun Yang,<sup>2#</sup> Jie Hong,<sup>3</sup> Xinhui Yu,<sup>3</sup> Baoqiang Li,<sup>4</sup> Wei Xu,<sup>2</sup>  
Yanbing Zhai<sup>2\*</sup>

1 Key Laboratory of Detection Technology of Focus Chemical Hazards in Animal-derived Food, State Administration for Market Regulation, Wuhan 430075, China

2 School of Medical Technology, Beijing Institute of Technology, Beijing 100081, China

3 Kunshan Nier Precision Instrumentation Inc., Kunshan, 215316, China

4 State Key Laboratory of NBC Protection for Civilian, Beijing, 102205, China

\*Corresponding Author:

Yanbing Zhai

School of Medical Technology

Beijing Institute of Technology

Haidian, Beijing, 100081, China

Email: zhaiyanbing@bit.edu.cn

# Authors contributed equally.

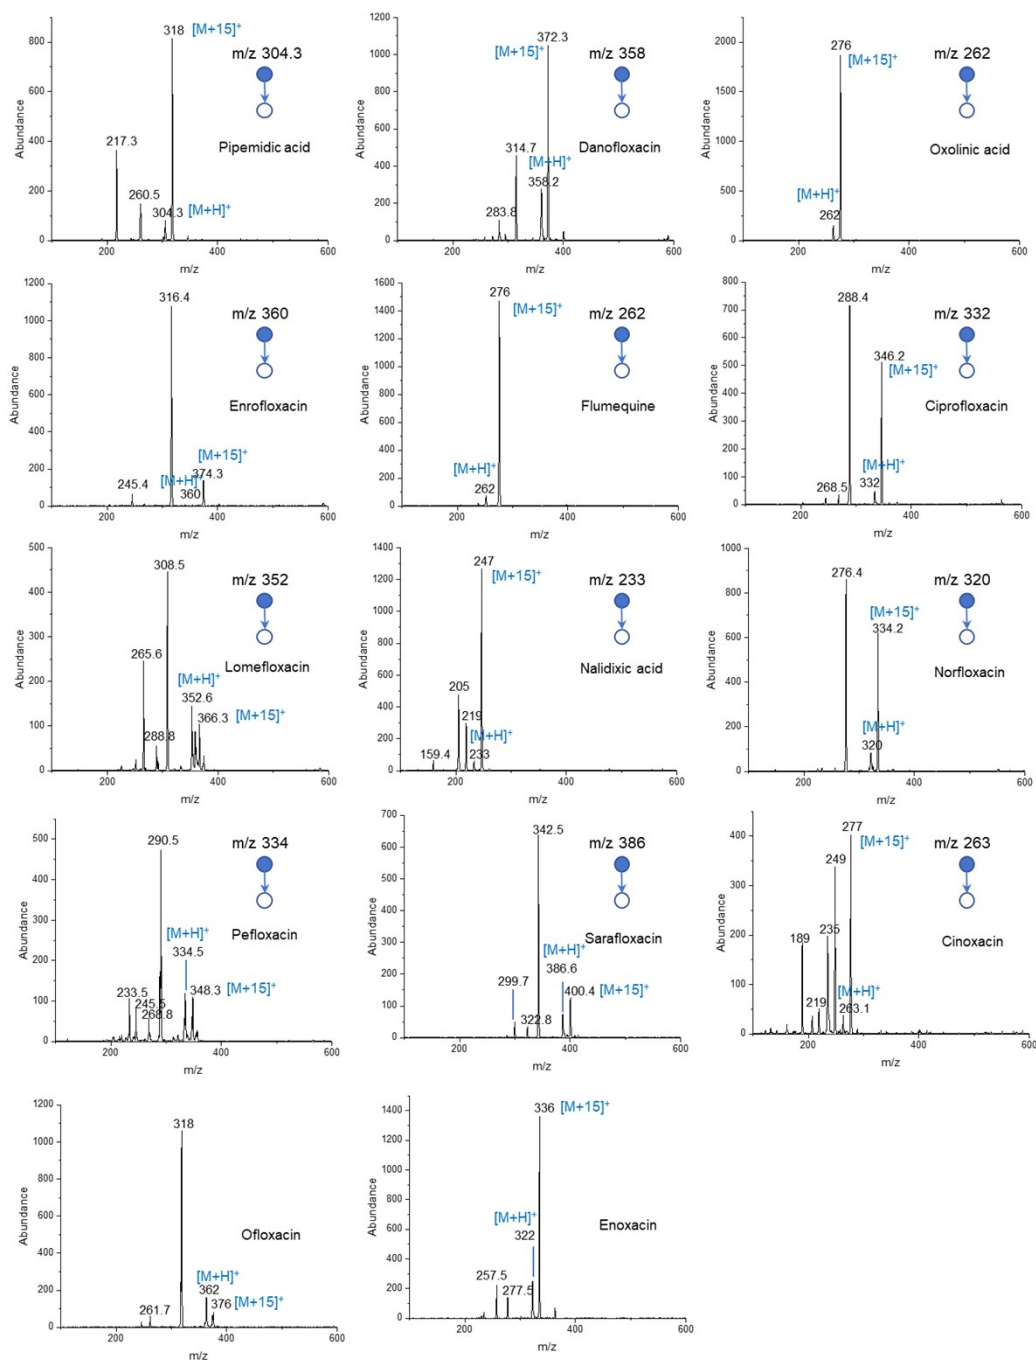

**Figure S1.** MS<sup>2</sup> tandem mass spectra of 14 all quinolones where adduct products were observed.

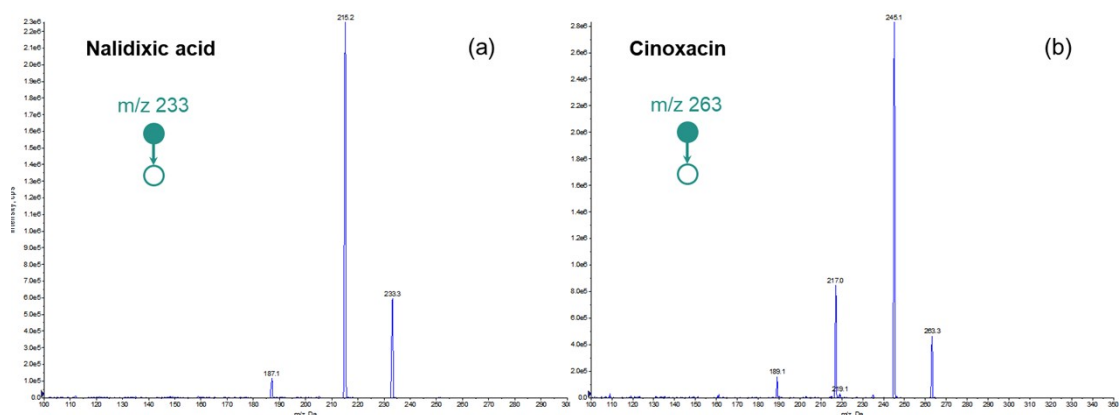

**Figure S2.** MS<sup>2</sup> tandem mass spectra of (a) nalidixic acid and (b) cinoxacin using QqQ mass spectrometer (AB4500 Triple Quad™, AB SCIEX). No adduct ions were generated for both analytes.

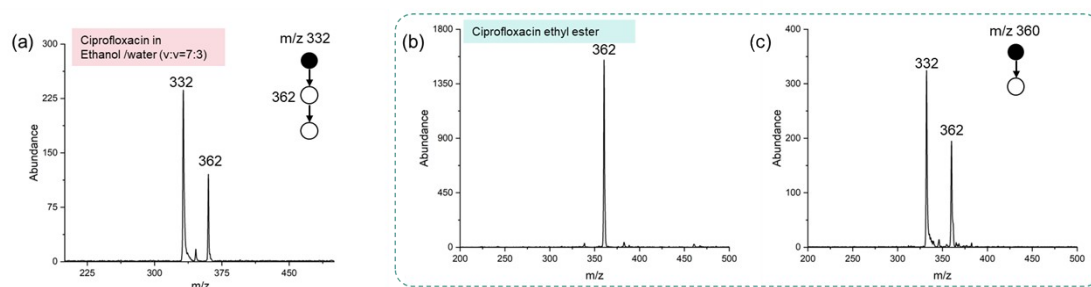

**Figure S3.** (a) MS3 spectrum of ciprofloxacin adduct (m/z 362); and full-MS spectrum (b), and MS2 spectrum of ciprofloxacin ethyl ester (m/z 362).

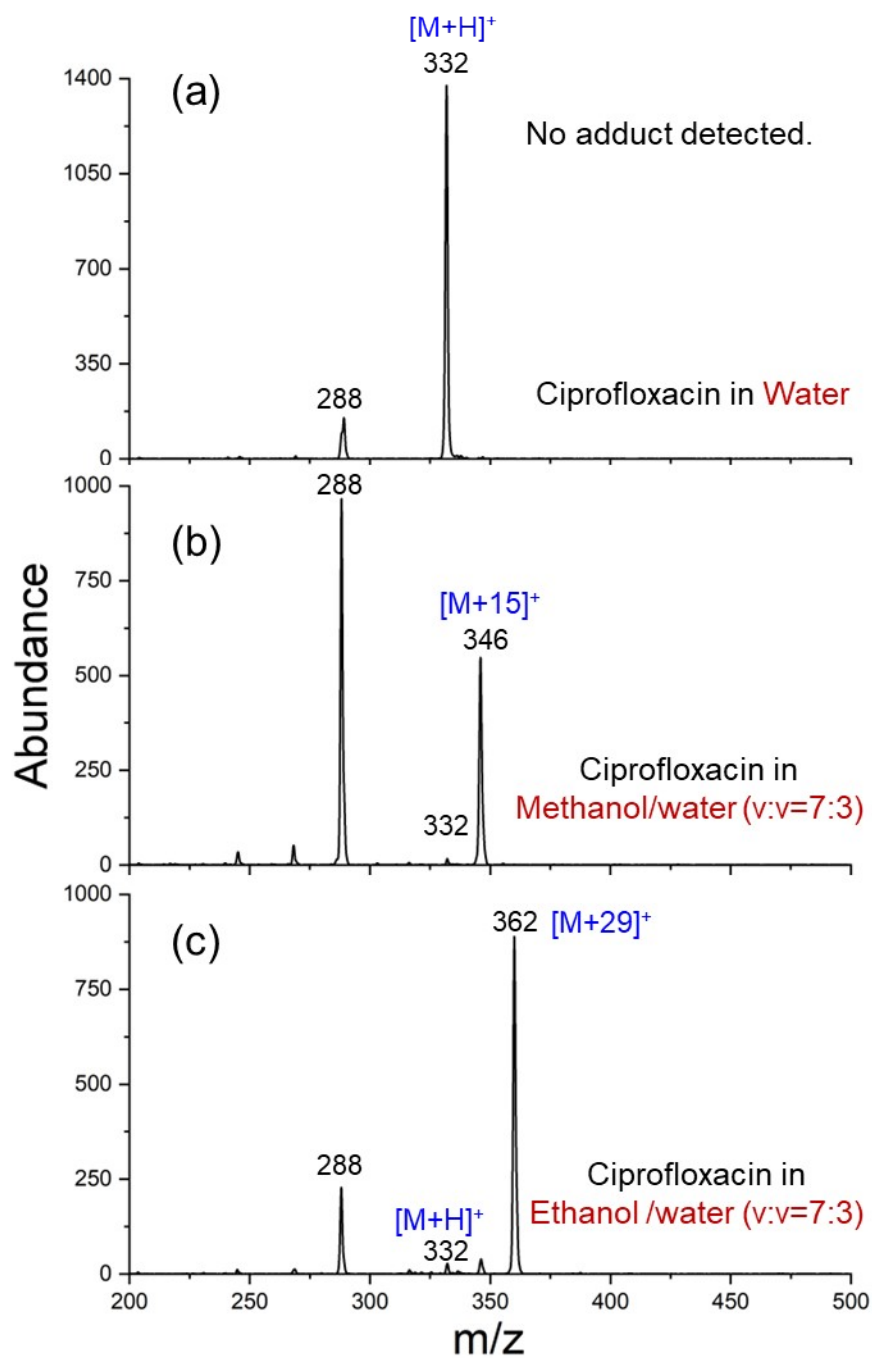

**Figure S4.** Tandem mass spectra of ciprofloxacin diluted in (a) water, (b) Methanol/water, and (c) Ethanol /water.

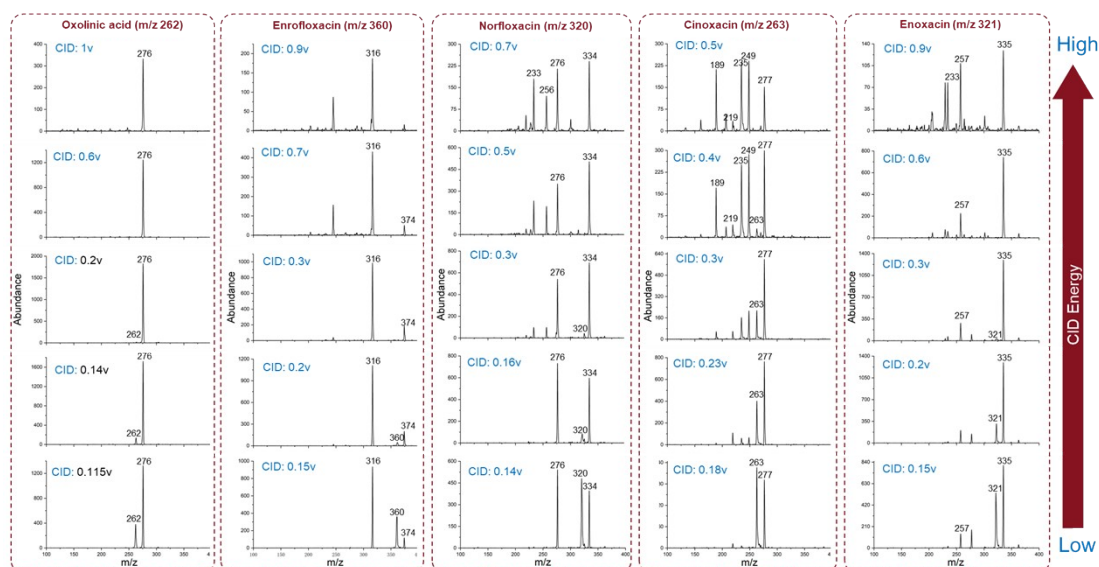

Figure S5. MS2 spectra of quinolones under different CID voltages.

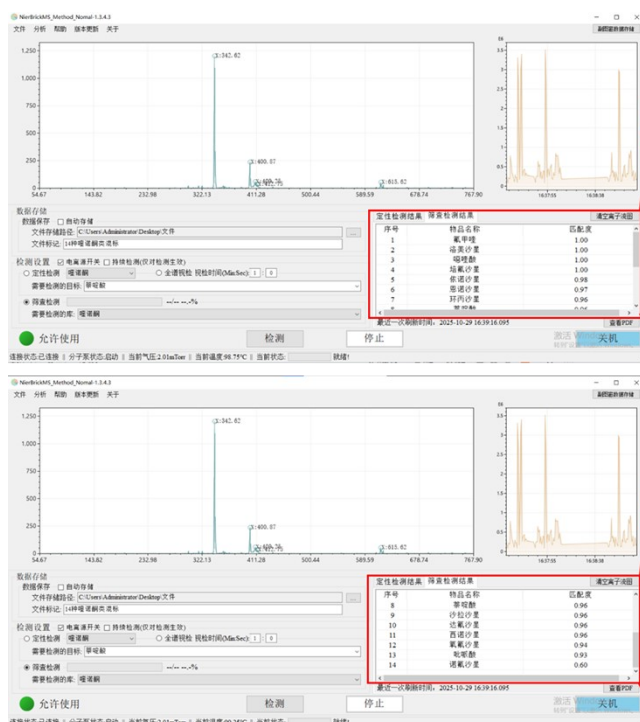

#### Screening result

| No. | Sample name   | Match score |
|-----|---------------|-------------|
| 1   | Flumequine    | 1.00        |
| 2   | Lomefloxacin  | 1.00        |
| 3   | Oxolinic acid | 1.00        |
| 4   | Pefloxacin    | 1.00        |
| 5   | Enoxacin      | 0.98        |
| 6   | Enrofloxacin  | 0.97        |
| 7   | Ciprofloxacin | 0.96        |

#### Screening result

| No. | Sample name    | Match score |
|-----|----------------|-------------|
| 8   | Nalidixic acid | 0.96        |
| 9   | Sarafloxacin   | 0.96        |
| 10  | Danofloxacin   | 0.96        |
| 11  | Cinoxacin      | 0.96        |
| 12  | Ofloxacin      | 0.94        |
| 13  | Pipemidic acid | 0.93        |
| 14  | Norfloxacin    | 0.6         |

Figure S6. The screen capture of the screening results of quinolones on MS software.

**Table S1.** Summary of screening results for the 14 quinolone standards using the conventional approaches without adduct peaks.

| No. | Name           | Chemical formula        | MW    | Confidence score |
|-----|----------------|-------------------------|-------|------------------|
| 1   | Nalidixic acid | $C_{12}H_{12}N_2O_3$    | 232.2 | 0.65             |
| 2   | Oxolinic acid  | $C_{13}H_{11}NO_5$      | 261.2 | 0.20             |
| 3   | Flumequine     | $C_{14}H_{12}FNO_3$     | 261.2 | 0.54             |
| 4   | Cinoxacin      | $C_{12}H_{10}N_2O_5$    | 262.2 | 0.68             |
| 5   | Pipemidic acid | $C_{14}H_{17}N_5O_3$    | 303.3 | 0.56             |
| 6   | Norfloxacin    | $C_{16}H_{18}FN_3O_3$   | 319.3 | 0.39             |
| 7   | Enoxacin       | $C_{15}H_{17}FN_4O_3$   | 320.3 | 0.58             |
| 8   | Ciprofloxacin  | $C_{17}H_{18}FN_3O_3$   | 331.3 | 0.36             |
| 9   | Pefloxacin     | $C_{17}H_{20}FN_3O_3$   | 333.3 | 0.55             |
| 10  | Lomefloxacin   | $C_{17}H_{19}F_2N_3O_3$ | 351.3 | 0.74             |
| 11  | Danofloxacin   | $C_{19}H_{20}FN_3O_3$   | 357.3 | 0.41             |
| 12  | Enrofloxacin   | $C_{19}H_{22}FN_3O_3$   | 359.4 | 0.74             |
| 13  | Ofloxacin      | $C_{18}H_{20}FN_3O_4$   | 361.3 | 0.36             |
| 14  | Sarafloxacin   | $C_{20}H_{17}F_2N_3O_3$ | 385.3 | 0.73             |

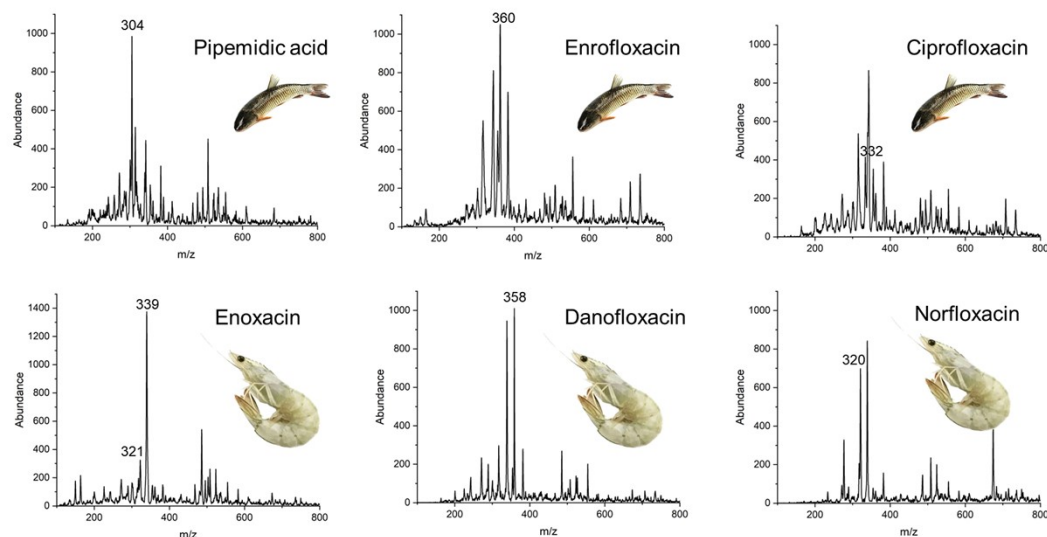

**Figure S7.** Full-scan mass spectra of (a) pipemidic acid, (b) enrofloxacin, and (c) ciprofloxacin detected in grass fish; and (d) enoxacin, (e) danofloxacin, and (f) norfloxacin detected in shrimp.
